# Supplementary material for: Impact of solution temperature-dependent aggregation on the solid-state packing and electronic properties of polymers for organic photovoltaics
Source: Royal Society of Chemistry journal article supplement (doi:10.1039/c8tc05378b), 2018-01-01
Supplement: c8tc05378b1.pdf [file c8tc05378b1.pdf]

## Supplementary Information

### **Impact of solution temperature-dependent aggregation on the solid-state packing and electronic properties of polymers for organic photovoltaics**

**Ajith Ashokan,<sup>†,1</sup> Tonghui Wang,<sup>†,1</sup> Mahesh Kumar Ravva,<sup>2</sup>  
and Jean-Luc Bredas<sup>\*,1</sup>**

*<sup>1</sup>School of Chemistry and Biochemistry & Center for Organic Photonics and Electronics (COPE), Georgia Institute of Technology, Atlanta, Georgia 30332-0400, United States*

*<sup>2</sup>Physical Science and Engineering Division, KAUST Solar Center (KSC), King Abdullah University of Science and Technology (KAUST), Thuwal 23955-6900, Kingdom of Saudi Arabia*

[†] These authors contributed equally to this work.

Corresponding author: [jean-luc.bredas@chemistry.gatech.edu](mailto:jean-luc.bredas@chemistry.gatech.edu)

## 1. Initial models used for the MD simulations:

### 1.1. PBT4T-2OD

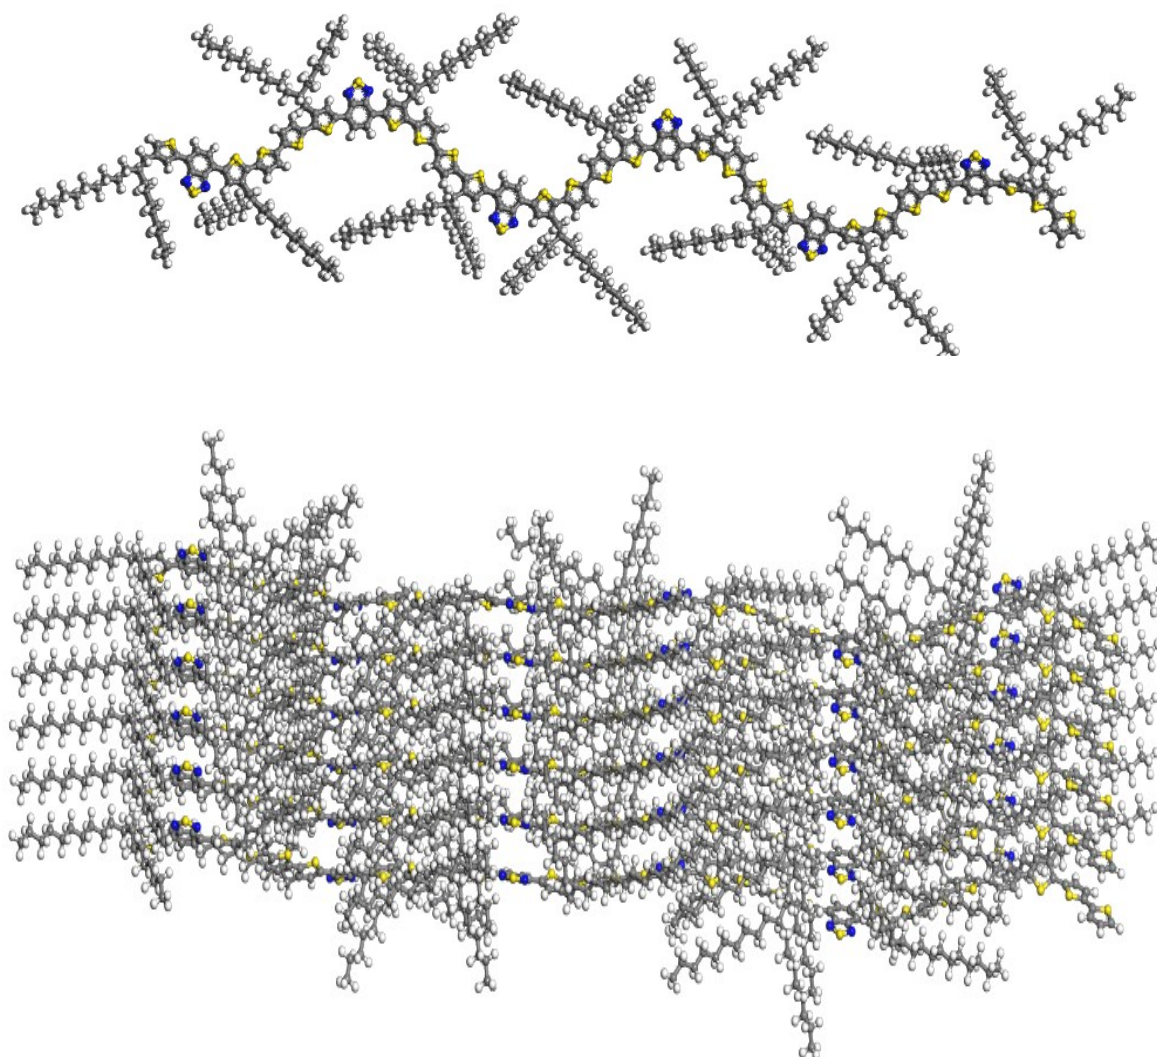

**Figure S1.** Illustration of the initial models used for the MD simulations: Top: A single polymer chain of PBT4T-2OD consisting of 6 repeat units. Bottom: A polymer stack made of 6 polymer chains perfectly packed on top of each other.

## 1.2. PffBT4T-2OD

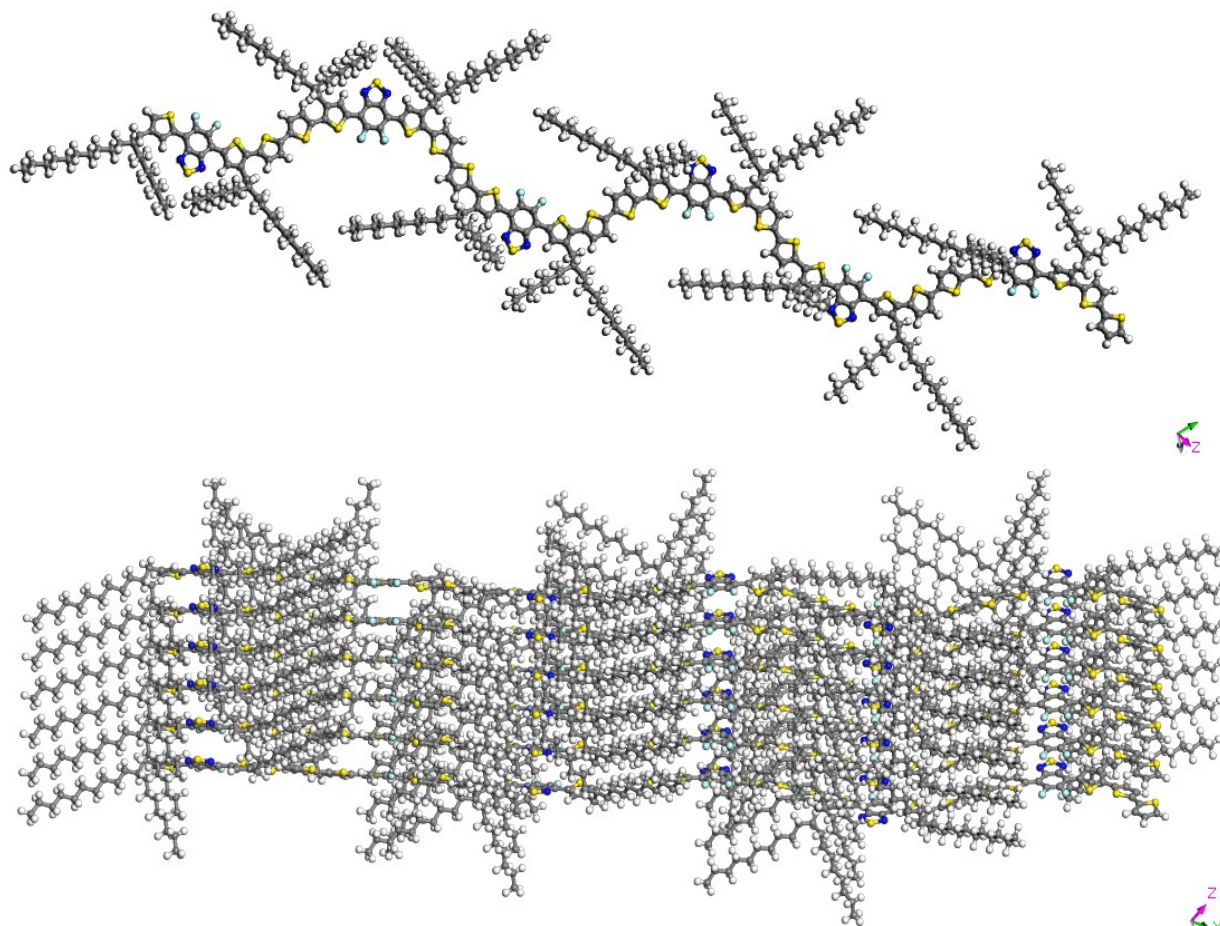

**Figure S2.** Illustration of the initial models used for the MD simulations: Top: A single polymer chain of PffBT4T-2OD consisting of 6 repeat units. Bottom: A polymer stack made of 6 polymer chains perfectly packed on top of each other.

## 2. Dihedral-angle distributions at various temperatures.

### 2.1. 40°C

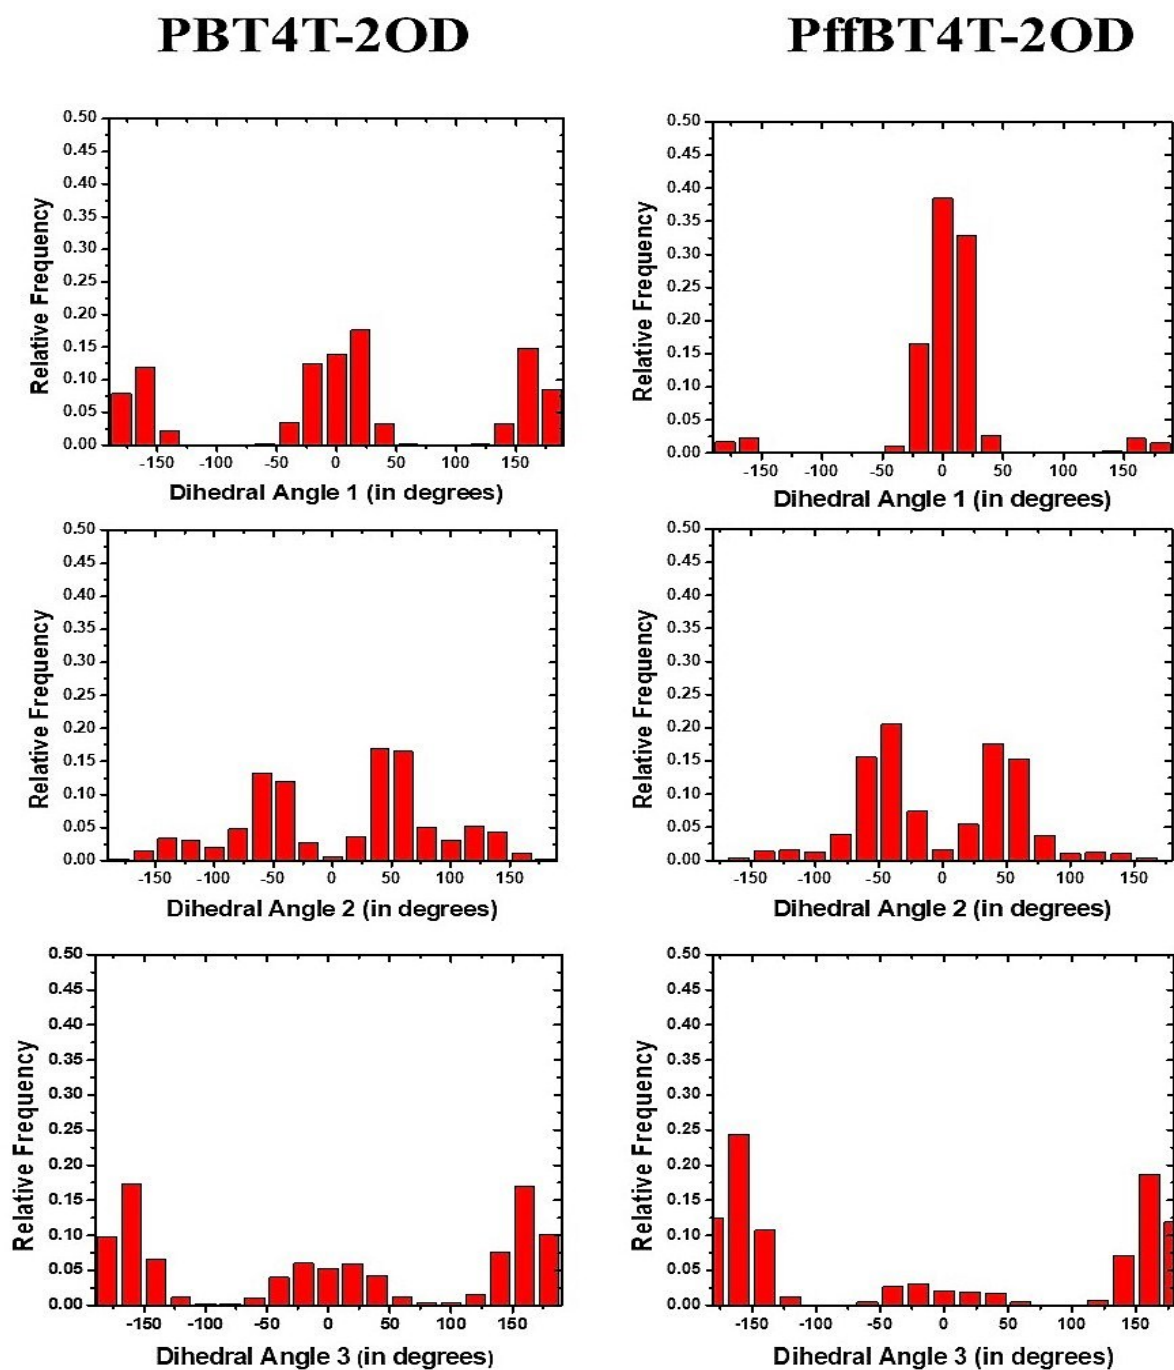

**Figure S3.** Distribution of the dihedral angles along the PBT4T-2OD (left) and PffBT4T-2OD (right) chains after MD simulations of the respective polymer stacks in solution at 40°C.

## 2.2. 60°C

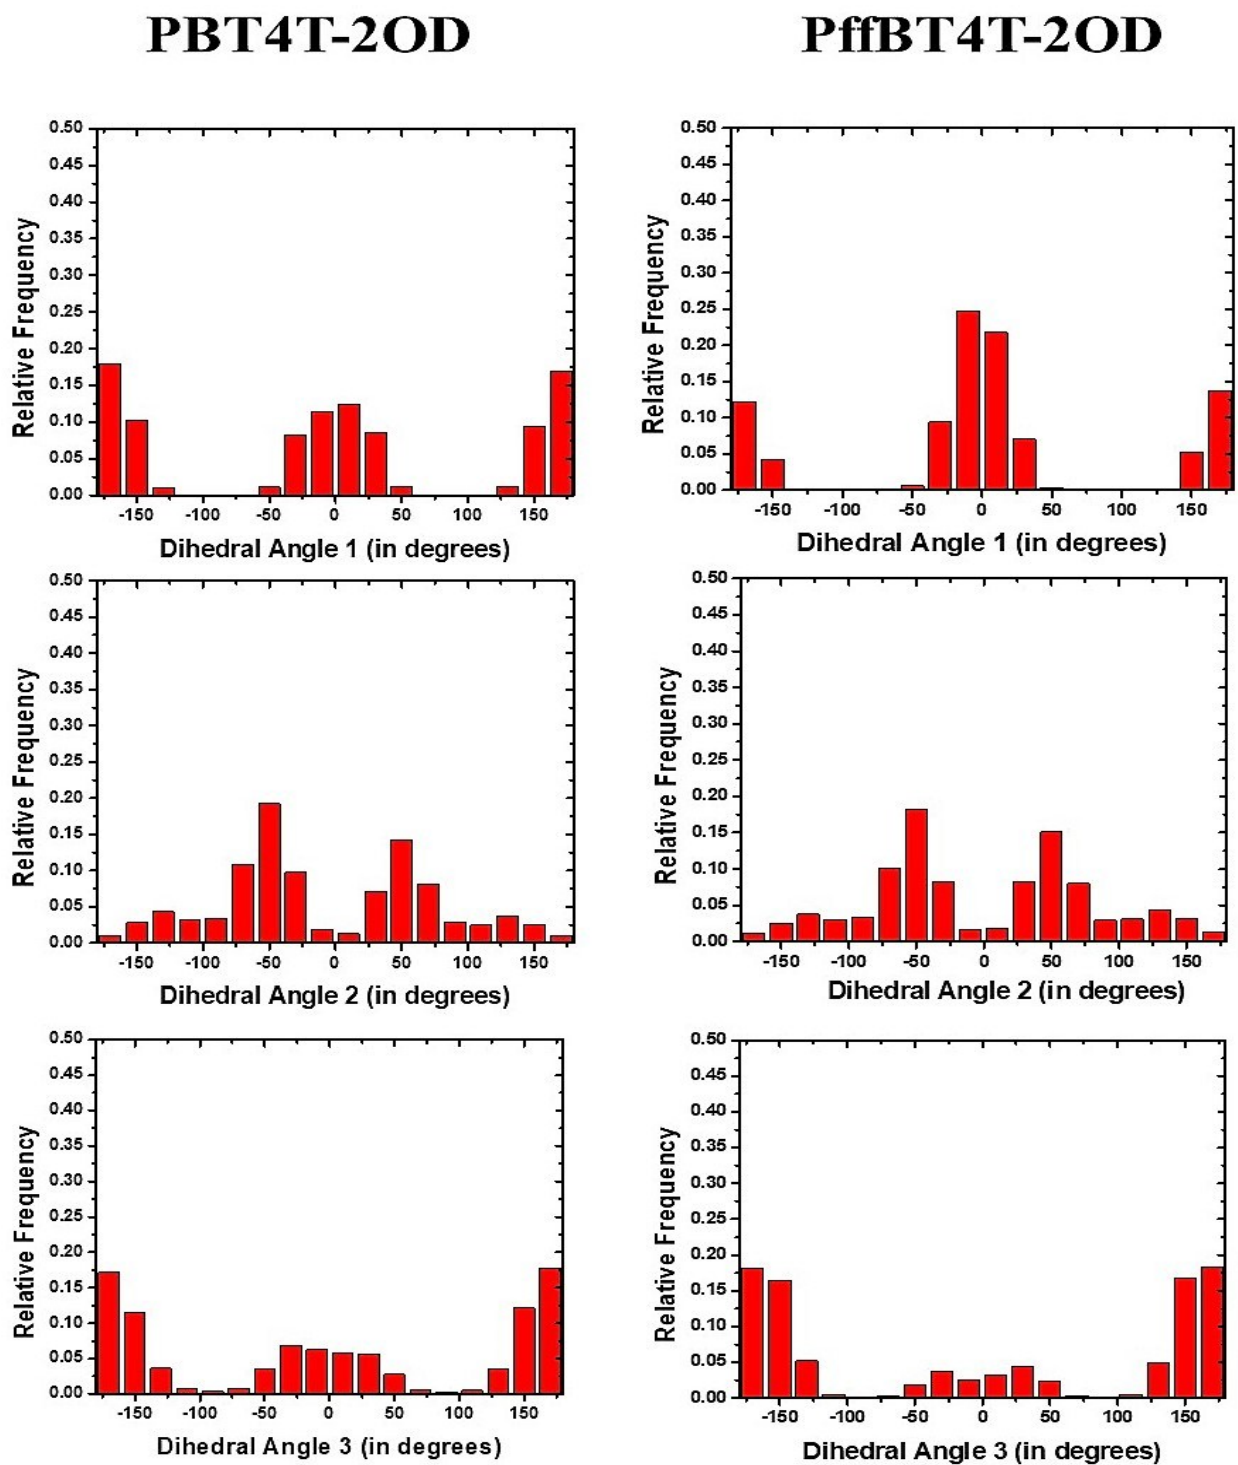

**Figure S4.** Distribution of the dihedral angles along the PBT4T-2OD (left) and PffBT4T-2OD (right) chains after MD simulations of the respective polymer stacks in solution at 60°C.

### 2.3. 80°C

## PBT4T-2OD

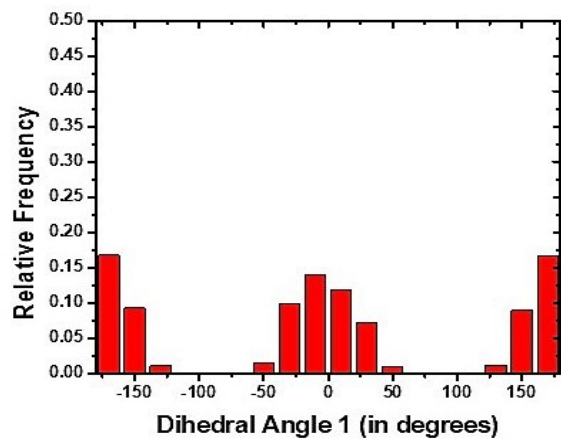

## PffBT4T-2OD

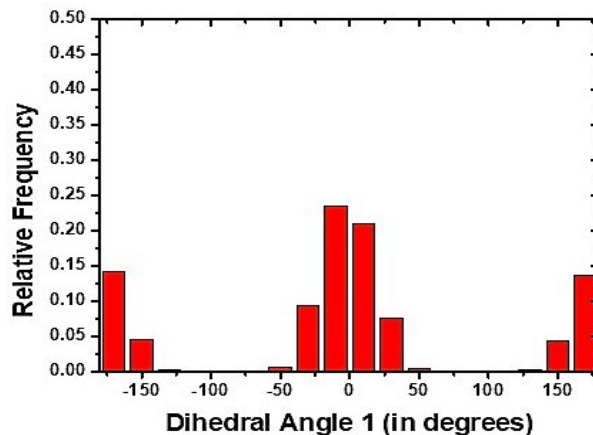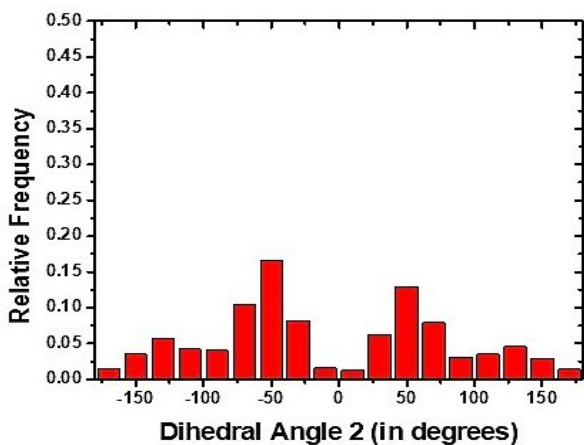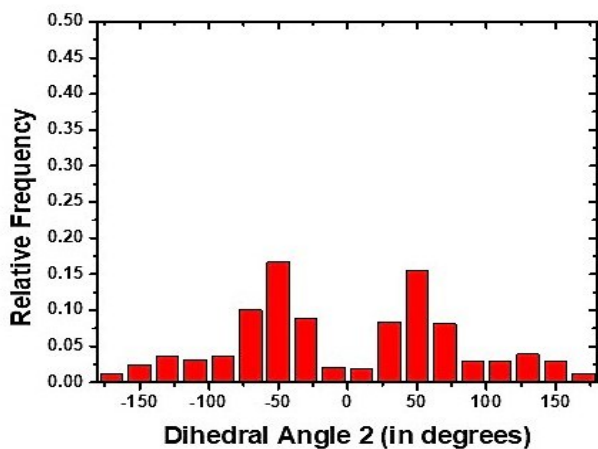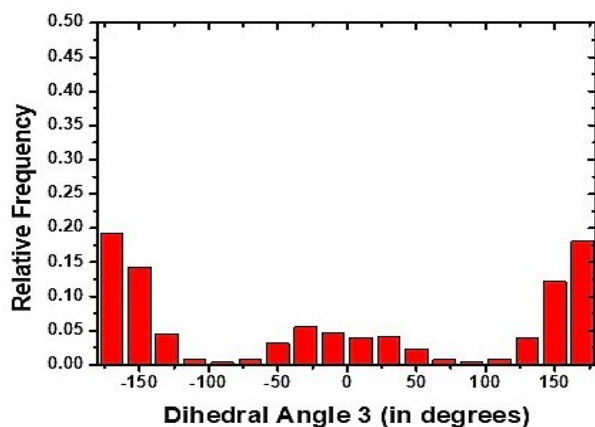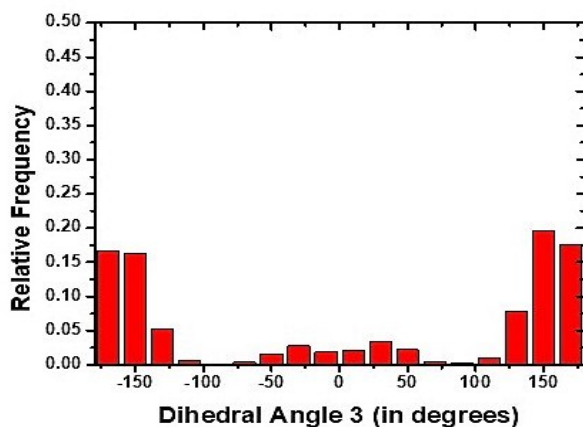

**Figure S5.** Distribution of the dihedral angles along the PBT4T-2OD (left) and PffBT4T-2OD (right) chains after MD simulations of the respective polymer stacks in solution at 80°C.

## 2.4. 100°C

### PBT4T-2OD

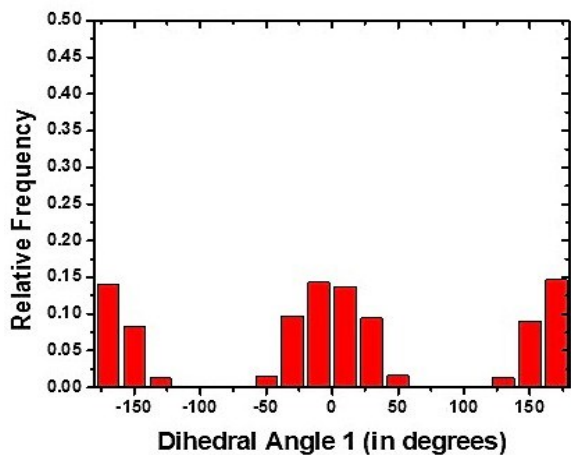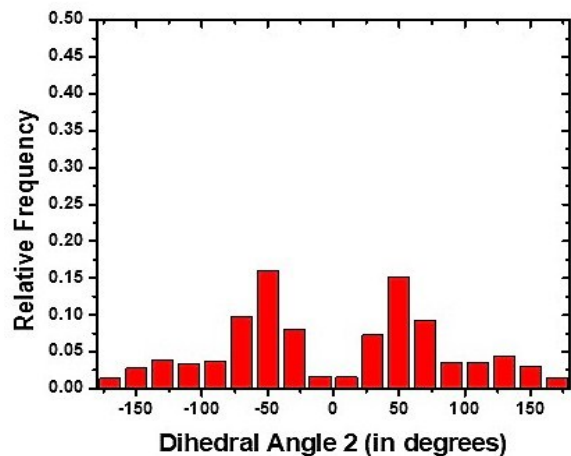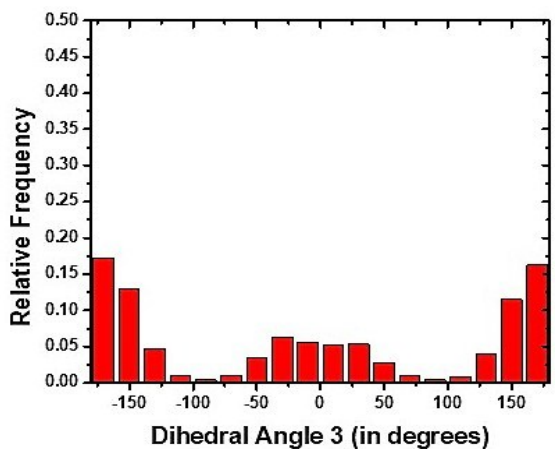

### PffBT4T-2OD

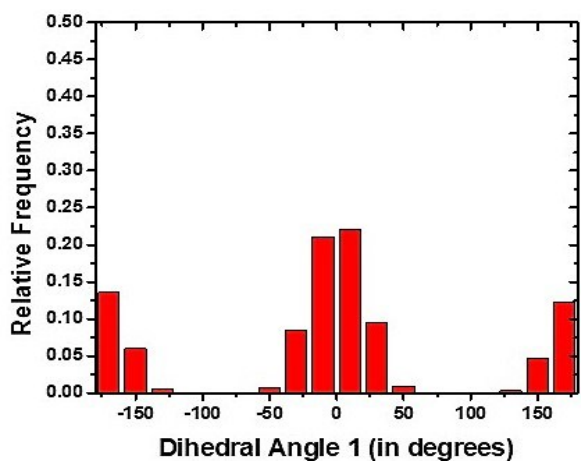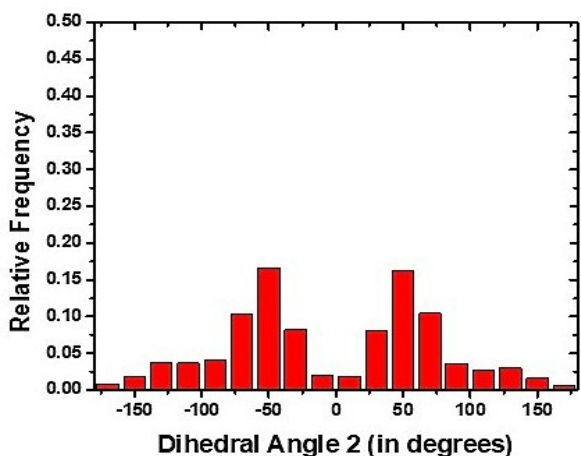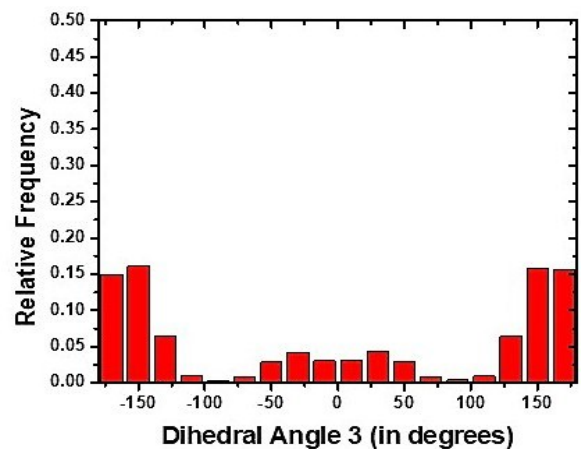

**Figure S6.** Distribution of the dihedral angles along the PBT4T-2OD (left) and PffBT4T-2OD (right) chains after MD simulations of the respective polymer stacks in solution at 100°C.

### 3. Binding energy

**Table S1.** Binding energies between two perfectly stacked dimer units, as calculated at the  $\omega$ B97XD/6-31G\*\* level of theory. A negative value indicates an attractive interaction.

| <b>Polymer</b> | <b>Binding Energy (in kcal/mol)</b> |
|----------------|-------------------------------------|
| PBT4T-2OD      | -56.7                               |
| PffBT4T-2OD    | -58.6                               |



#### 4. Molecular orbital distributions

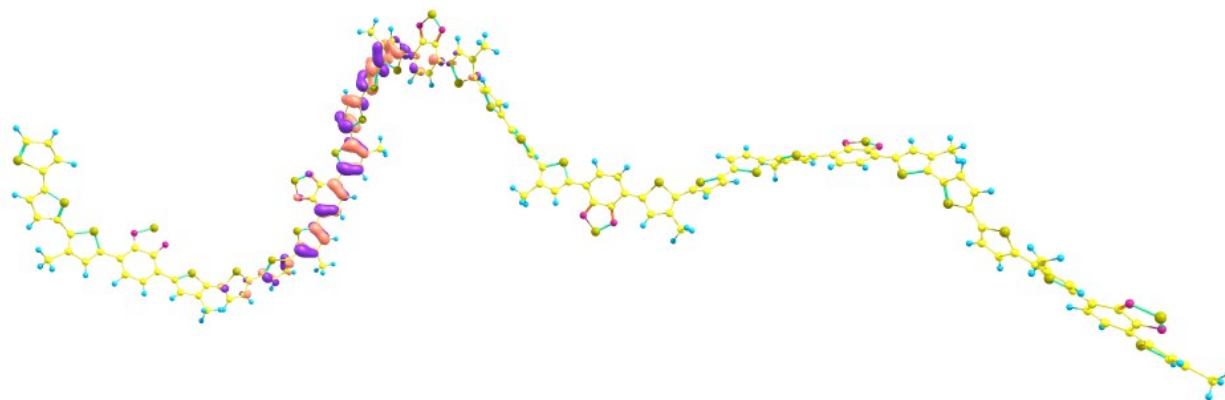

**PBT4T-2OD**

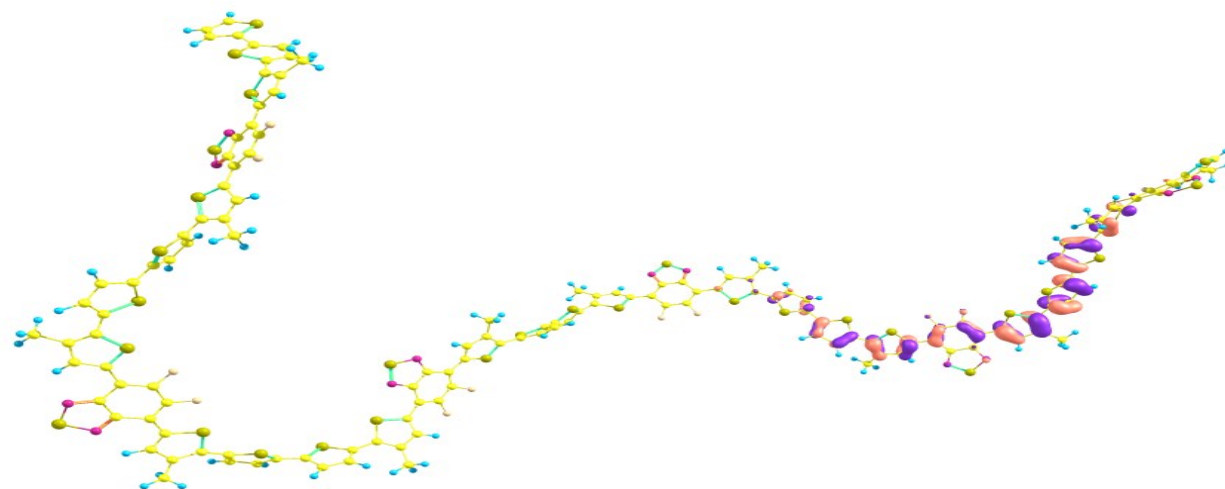

**PffBT4T-2OD**

**Figure S7.** HOMOs of PBT4T-2OD and PffBT4T-2OD, as calculated at the  $\omega$ B97XD/6-31G\*\* level of theory.

## 5. Sample selection for electronic coupling calculations

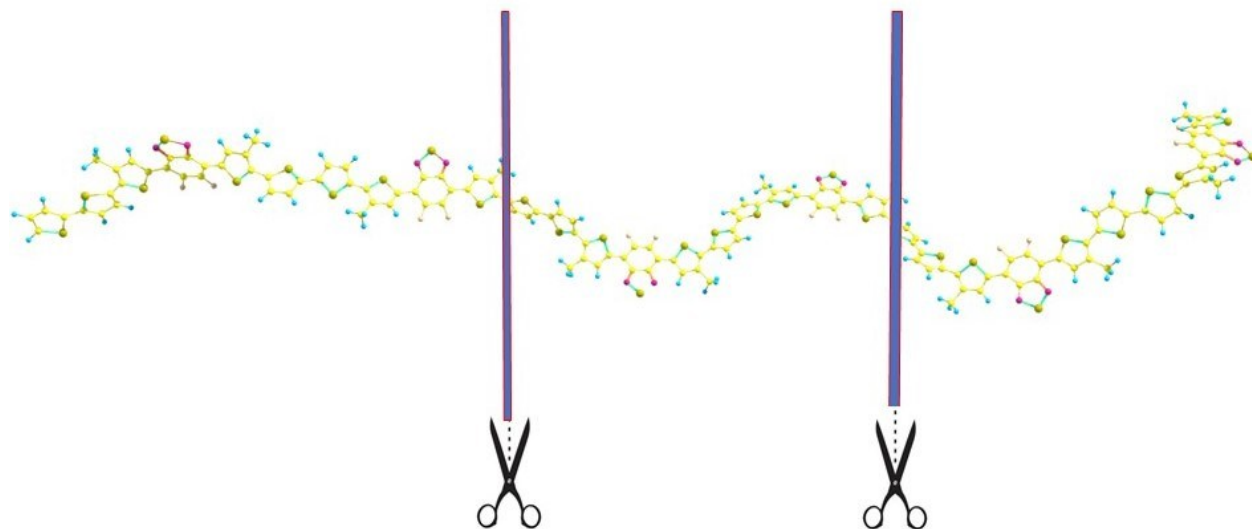

**Figure S8.** Illustration of the cut of a polymer chain with six repeat units into segments of two repeat units each.

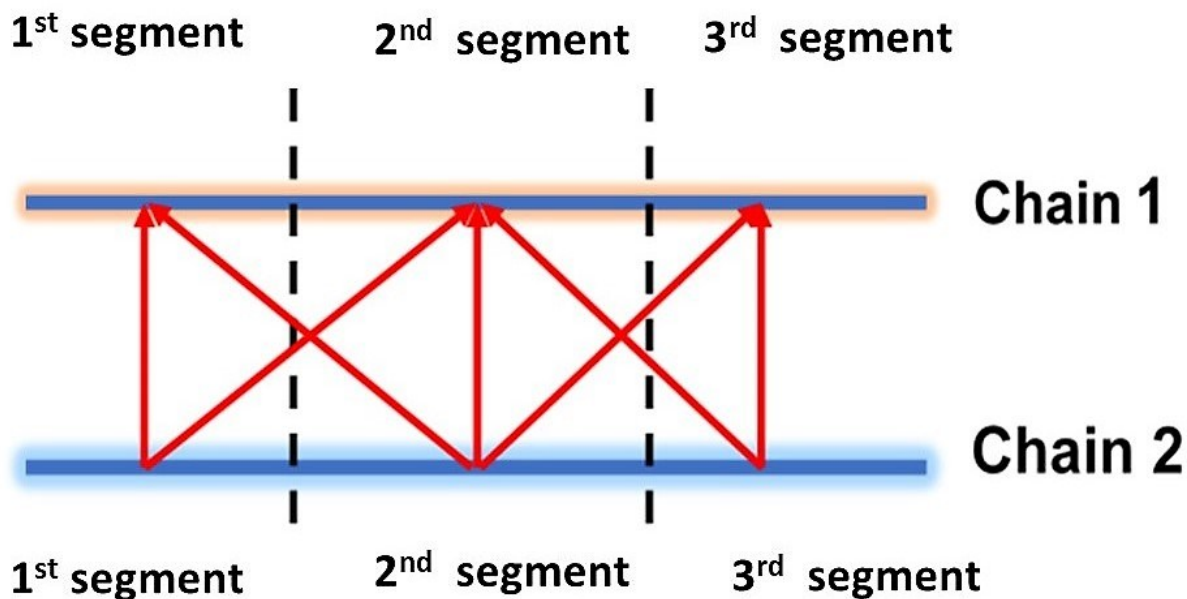

**Figure S9.** Illustration of the protocol for the calculation of the electronic couplings between adjacent chains.

For the electronic-coupling calculations, the polymer chains extracted from the stacks given by the MD simulations are cut into three segments of two repeat units each (see **Figure S8**). As shown above, every pair of adjacent chains in the polymer stacks are cut and the HOMO-HOMO couplings between the corresponding segments are calculated. We have considered the electronic couplings between the segments connected by arrows in **Figure S9**.
